# Supplementary material for: A novel mechanism for user-friendly and self-activated microdroplet generation capable of programmable control
Source: Royal Society of Chemistry journal article supplement (doi:10.1039/c8an00035b), 2018-01-01
Supplement: c8an00035b1.pdf [file c8an00035b1.pdf]

## A novel mechanism for user-friendly and self-activated microdroplet generation capable of programmable control

Yangyang Jiang,<sup>a1</sup> Lin Du,<sup>b1</sup> Quanquan Mu,<sup>a</sup> Yuanming Li,<sup>a</sup> Zhongxu Cui,<sup>a</sup> Jia Zhou,<sup>b</sup> and Wenming Wu<sup>\*a,b</sup>

<sup>a</sup> State Key Laboratory of Applied Optics, Changchun Institute of Optics, Fine Mechanics and Physics, Chinese Academy of Sciences, Changchun, 130033, China.

<sup>b</sup> State Key Laboratory of ASIC and Systems, Fudan University, Shanghai 200433, China.

\*Corresponding author: [wuwm@ciomp.ac.cn](mailto:wuwm@ciomp.ac.cn)

Electronic Supplementary material (ESI 1)

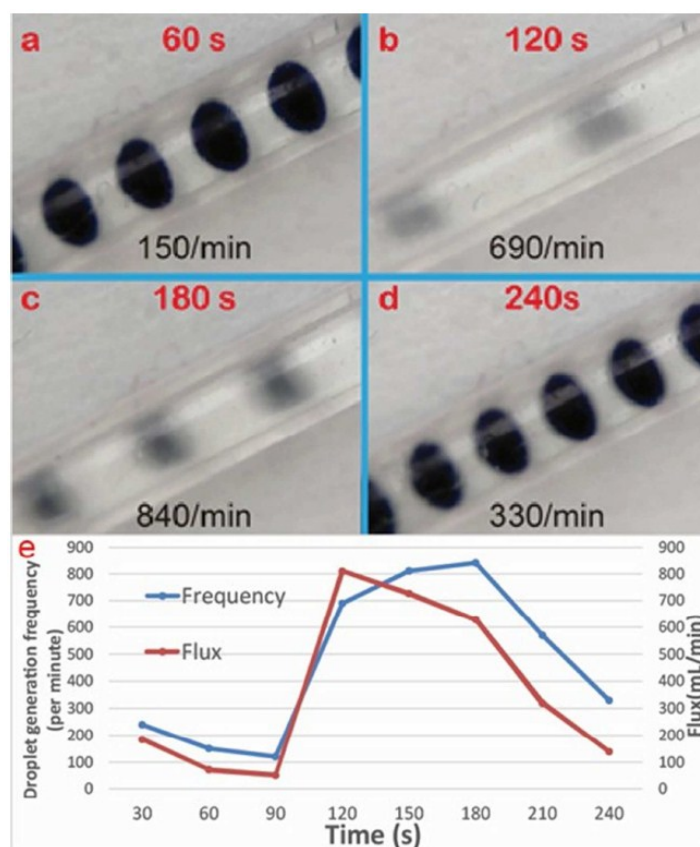

Fig. S1 (a) ~ (d) Series of photos comparing the droplet generation inside Teflon tube at 60, 120, 180, 240 s. (e) The control of droplet generation frequency and self-powered flux by end-blunted valve.
